# Supplementary material for: Was there an improvement in the years of life lost (YLLs) for non-communicable diseases in the Soma and Minamisoma cities of Fukushima after the 2011 disaster? A longitudinal study
Source: HighWire-hosted journal article supplement (doi:10.1136/bmjopen-2021-054716), 2022-04-01
Supplement: bmjopen-2021-054716supp001_data_supplement.pdf [file bmjopen-2021-054716supp001_data_supplement.pdf]

Supplemental Material

Title

Was there an improvement in the years of life lost (YLLs) for noncommunicable diseases in the Soma and Minamisoma Cities of Fukushima after the 2011 disaster?: A longitudinal study

Authors

Kyoko Ono<sup>1)</sup>, Michio Murakami<sup>2)</sup>, #, Masaharu Tsubokura<sup>3), 4)</sup>

Affiliations

1) Research Institute of Science for Safety and Sustainability, National Institute of Advanced Industrial Science and Technology, 16-1 Onogawa, Tsukuba, Ibaraki 305-8569, Japan

2) Department of Health Risk Communication, Fukushima Medical University School of Medicine, Fukushima City, Fukushima 960-1295, Japan

3) Department of Radiation Health Management, Fukushima Medical University School of Medicine, Fukushima City, Fukushima 960-1295, Japan

4) Research Center for Community Health, Minamisoma Municipal General Hospital, Minamisoma City, Fukushima 975-0033, Japan

# Center for Infectious Disease Education and Research, Osaka University, Suita City, Osaka, 565-0871, Japan (current address)

Correspondence

Kyoko ONO, PhD.

Research Institute of Science for Safety and Sustainability, National Institute of Advanced Industrial Science and Technology, 16-1 Onogawa, Tsukuba, Ibaraki 305-8569, Japan

Tel: +81-29-861-4854

Fax: +81-29-861-8411

E-mail: [kyoko.ono@aist.go.jp](mailto:kyoko.ono@aist.go.jp)

ORCID iD: 0000-0001-8100-3905

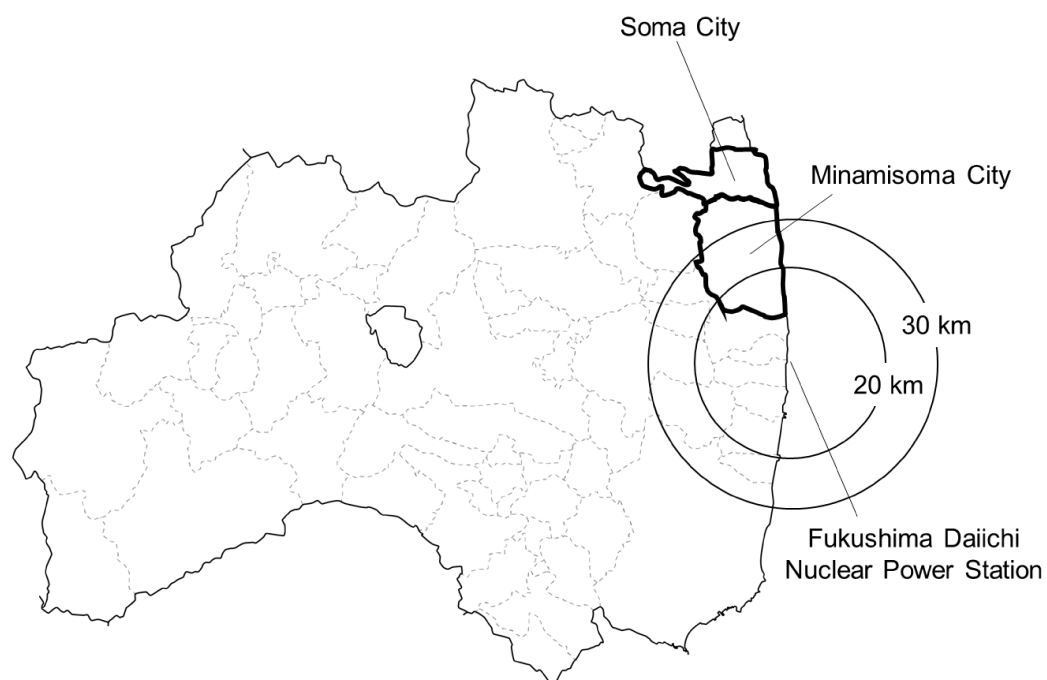

Figure S1. Location of Soma City and Minamisoma City.

## MATERIALS AND METHODS

### Rationale of calculation for life expectancy (LE) and years of life lost (YLL)

Life expectancy (LE) is an index of the health status of a cohort, which is calculated from the age-specific mortality of a specific cohort over a given period using the life table method. This measure emphasizes the impact of deaths occurring in younger age groups compared to the relative risk or hazard of mortality.[1] YLL is the difference in LE between a cohort with a specific cause of death and for the cohort in which the cause of death was eliminated. YLL is a population outcome of social health. For example, the Global Burden of Disease studies [2] adopted the YLL as an index of regional health.

LE can be calculated from the age-specific mortality rates (life table analysis). Using the death data and population data, we conducted a life-table analysis for the subject area and the national average of Japan, respectively. The life table consists of the mortality rate, number of surviving population  $l$ , number of deaths  $d$ , age-specific mortality  $q$ , which is obtained by dividing number of deaths by the number of the surviving population, and total survival time of population  $T$ .

A conceptual diagram of the YLL is shown in Figure 1. A detailed explanation of the calculation of LE and YLL has been provided elsewhere.[3] Generally, an LE at age  $x$  is the value of how long a person survives on average in the population after age  $x$ . Survival at age  $x$  is described by the mortality rate at age  $x$ . LE can be obtained by dividing the total survival time of the population.

$$T_x = \int_x^{\infty} l_t dt \quad (\text{eq. 1})$$

Here,  $T_x$  [unit: person-years] is the total survival time of the population after age  $x$  by the population  $l_x$  at age  $x$ . LE at age  $x$ ;  $e_x$  [unit: years] is obtained as

$$e_x = \frac{T_x}{l_x} \quad (\text{eq. 2})$$

$YLL_x$  was defined as the difference of  $e_x$  between a risk event ( $e'_x$ ) and without a risk event ( $e_x$ ) at age  $x$ :

$$YLL_x = e_x - e'_x \quad (\text{eq. 3})$$

YLL can be estimated for any risk event that causes additional mortality. YLL can be estimated for any population if the survival probabilities are available for the population.

## 69 Mortality rate

70 We obtained the mortality rate of patients aged 1–94 years using the following concept. Based  
 71 on the basics of human demographics that normalized the mortality rate of age, which is the  
 72 ratio of the number of deaths at the age of  $x$  in an arbitrary year to the number of population  
 73 (survivals) at the age of  $x$  in the middle of the year. In the formula,

$$74 \quad q_x = \frac{d_x}{l_x + \frac{d_x}{2}} \quad (\text{eq. 4})$$

75 where  $q_x$  is the mortality rate at age  $x$ . If death occurs at a constant rate, the number of population  
 76 at age  $x$  at the beginning of the observation period should be  $l_x + d_x/2$ . For the right side of (eq.4),  
 77 divide both the numerator and denominator by  $l_x$  and replace  $d_x/l_x$  as  $m_x$ .

$$78 \quad \frac{d_x}{l_x + \frac{d_x}{2}} = \frac{\frac{d_x}{N_x}}{\frac{l_x + \frac{d_x}{2}}{l_x + \frac{d_x}{2 \times l_x}}} \quad (\text{eq. 5})$$

$$79 \quad q_x = \frac{m_x}{1 + \frac{m_x}{2}} \quad (\text{eq. 6})$$

80 where  $q_x$  is the mortality rate at age  $x$ , and  $m_x$  is the crude mortality rate at age  $x$ . Thus, we  
 81 calculated  $q_x$  using (eq. 6) for further analyses. We calculated mortality rates at age  $x$  with risk  
 82 events ( $q_x$ ) in the same way using cause-specific death data.

83

84 The mortality rates at age 0 were adopted as national values for 2010 and 2015, respectively.  
 85 Both were reported by the MHLW.[4,5] The birth data of the subject area did not include details  
 86 on the month of birth or death for babies at age 0. Generally, the baby cohort has a large change  
 87 in mortality over a short period of time. Thus, monthly life table data should be used for these  
 88 analyses, but we could not do so due to limited data availability at age 0. Therefore, we adopted  
 89 national data to calculate  $q_0$  for the subject area. Although this assumption for the age 0 might  
 90 cause a discrepancy in YLL because YLL weighs heavily on younger age, we assumed the  
 91 discrepancy was negligible by using the national data instead of data of the subject area. At  
 92 ages over 95 years, we used the force of mortality instead of  $q_x$ . This assumption is commonly  
 93 used for national averages and subject areas. The force of mortality was based on Gompertz–  
 94 Makeham coefficients obtained from the MHLW [6,7] because of the large annual variability  
 95 of  $q$  in this age range because the number of deaths for the population is small. This assumption  
 96 on mortality rates for the elderly, such as for an age over 95 years, has little effect on the  
 97 calculated results of LE.

98

## 99 Methodological details of sensitivity analysis on YLL in the subject area

100 We performed a sensitivity analysis for the subject area. The Monte Carlo simulation was  
 101 conducted using a random number generation based on the 5-year-average and standard  
 102 deviation for both the populations and crude mortality rates at age 0–94 years before the

calculation of the mortality rates. The uncertainty interval (UI) was estimated according to the following procedure:

Oracle Crystal Ball ver.11.1 was used for the Monte Carlo simulation. We used two-sided truncated normal distributions for crude mortality rates to avoid a random selection of crude mortality rates of less than 0. Thus, the distributions were set as symmetrical, around the average, with the lower limit being 0 and the upper limit being two times the average. The Excel add-in “NTTRUNCNORMINV” function in NtRand Ver 3.3.0 [8] was combined with the Monte Carlo simulation. Sampling was performed according to the Latin hypercube method, and the number of trials was set to 10000 times. Random numbers were generated for all the causes of death and for each specific cause of death, separately, and the calculation of YLL was conducted at each trial. At age 0 and at ages over 95 years, we assumed no distribution for the force of mortalities.

We performed an additional Monte Carlo simulation with the condition that the mortality rate  $q$  was less than 0 (no truncated option) for validation. We confirmed that the change in the median was approximately 3% for the absolute value of YLL and the truncated assumption rendered the median change into both higher and lower values. Although the range of the UIs was broadened, it was confirmed that the conditions with and without the truncated option did not affect the results significantly.

124    **YLL and its difference at ages 40, 65 and 75**

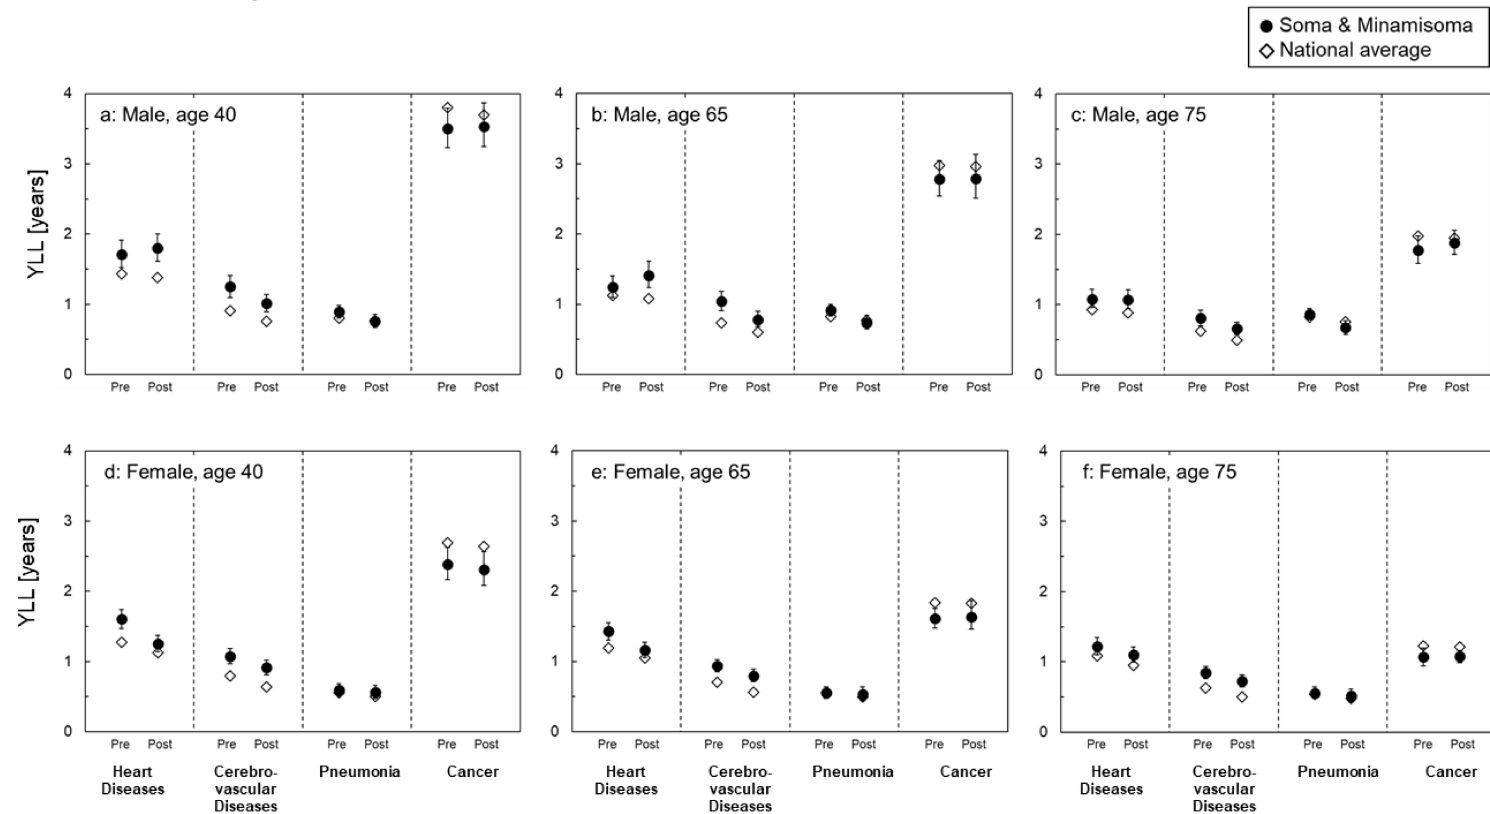

125 Figure S2a-f. YLLs due to heart diseases, cerebrovascular diseases, pneumonia, and cancer before and after the disaster of ages 40, 65 and 75 (a–  
126 c: Males, d–f: Females). For the subject area (Soma and Minamisoma cities), the error bar indicates the 95% uncertainty interval (95% UI) of the  
127 estimate.  
128

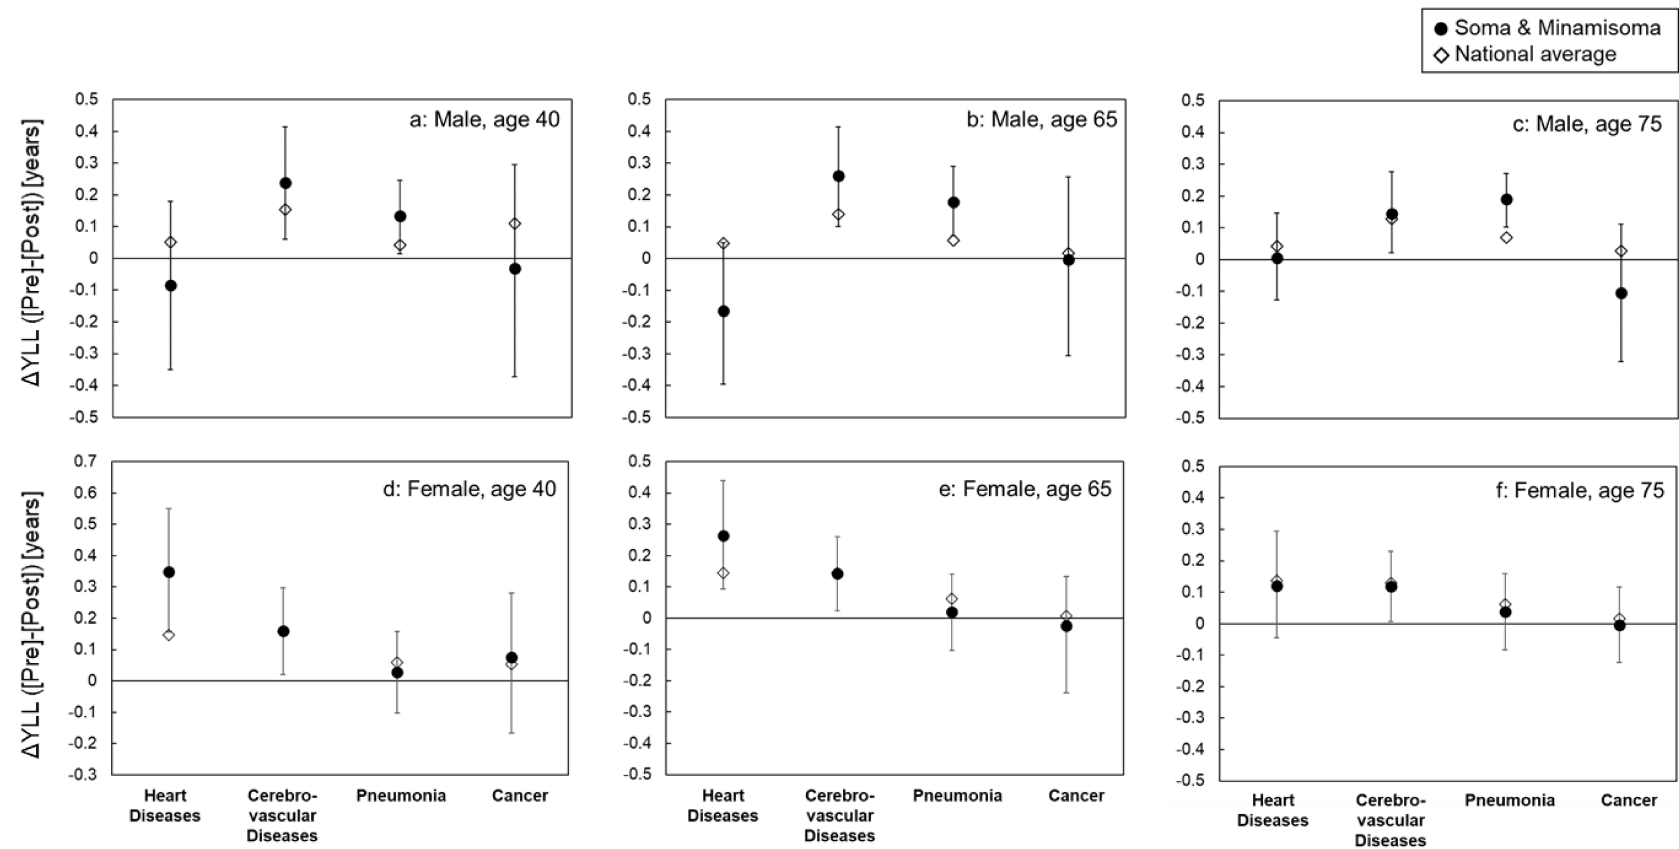

Figure S3a-f. Differences between YLL pre-disaster and YLL post-disaster due to heart diseases, cerebrovascular diseases, pneumonia, and cancer at ages 40, 65 and 75 (a –c: Males, d–f: Females). For the subject area (Soma and Minamisoma cities), the error bar indicates the 95% UI of the estimate.

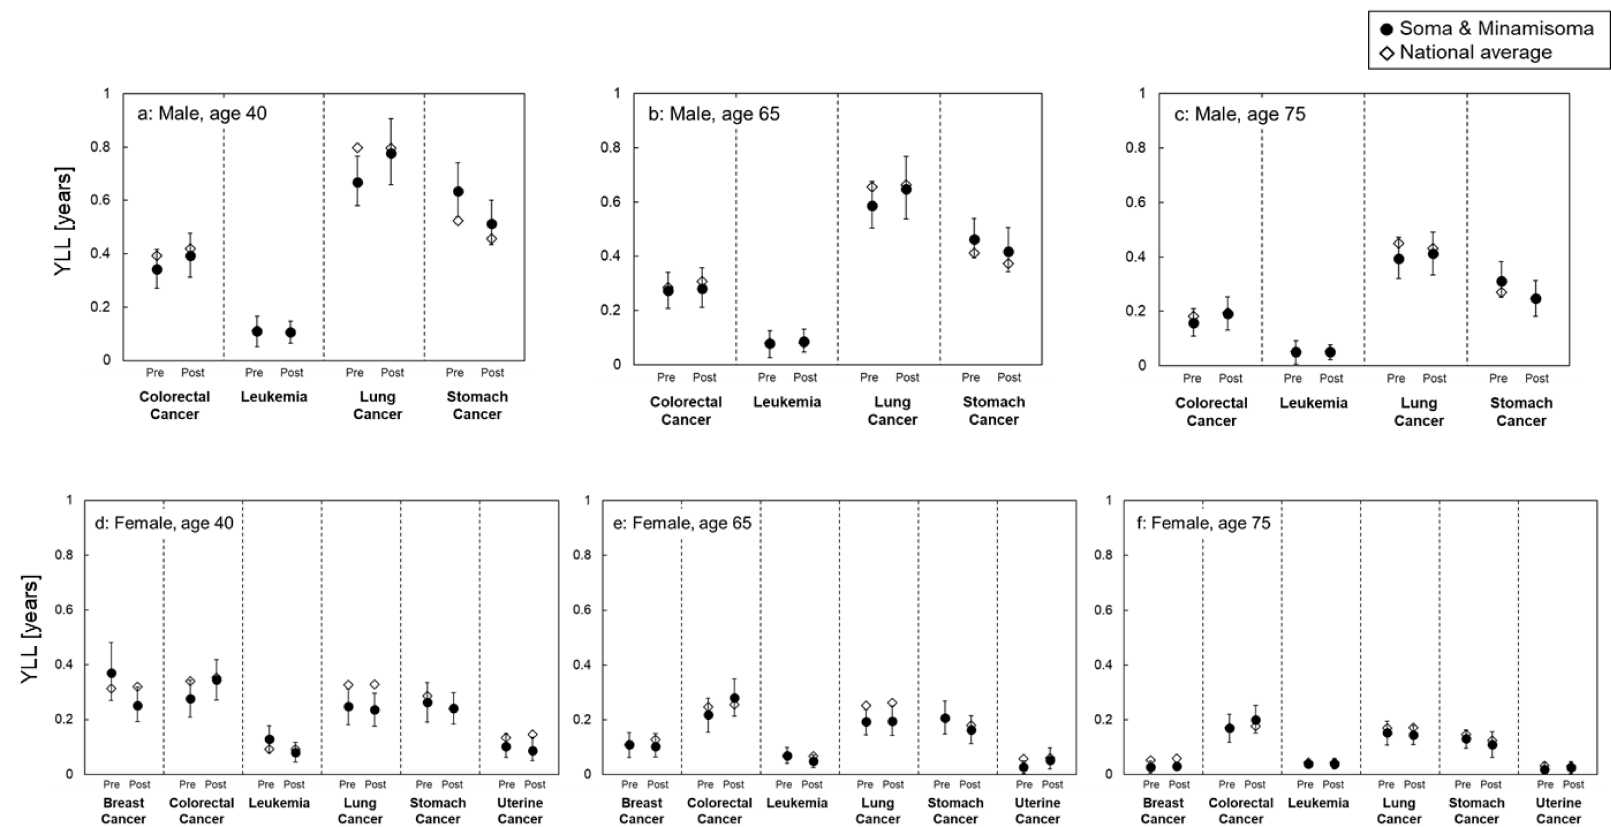

Figure S4a-f. YLLs due to specific cancers before and after the disaster at ages 40, 65 and 75 (a–c: Males; colorectal cancer, leukemia, lung cancer, and stomach cancer. d–f: Females, breast cancer, colorectal cancer, leukemia, lung cancer, stomach cancer and uterine cancer.). For the subject area (Soma and Minamisoma cities), the error bar indicates the 95% uncertainty interval (95% UI) of the estimate.

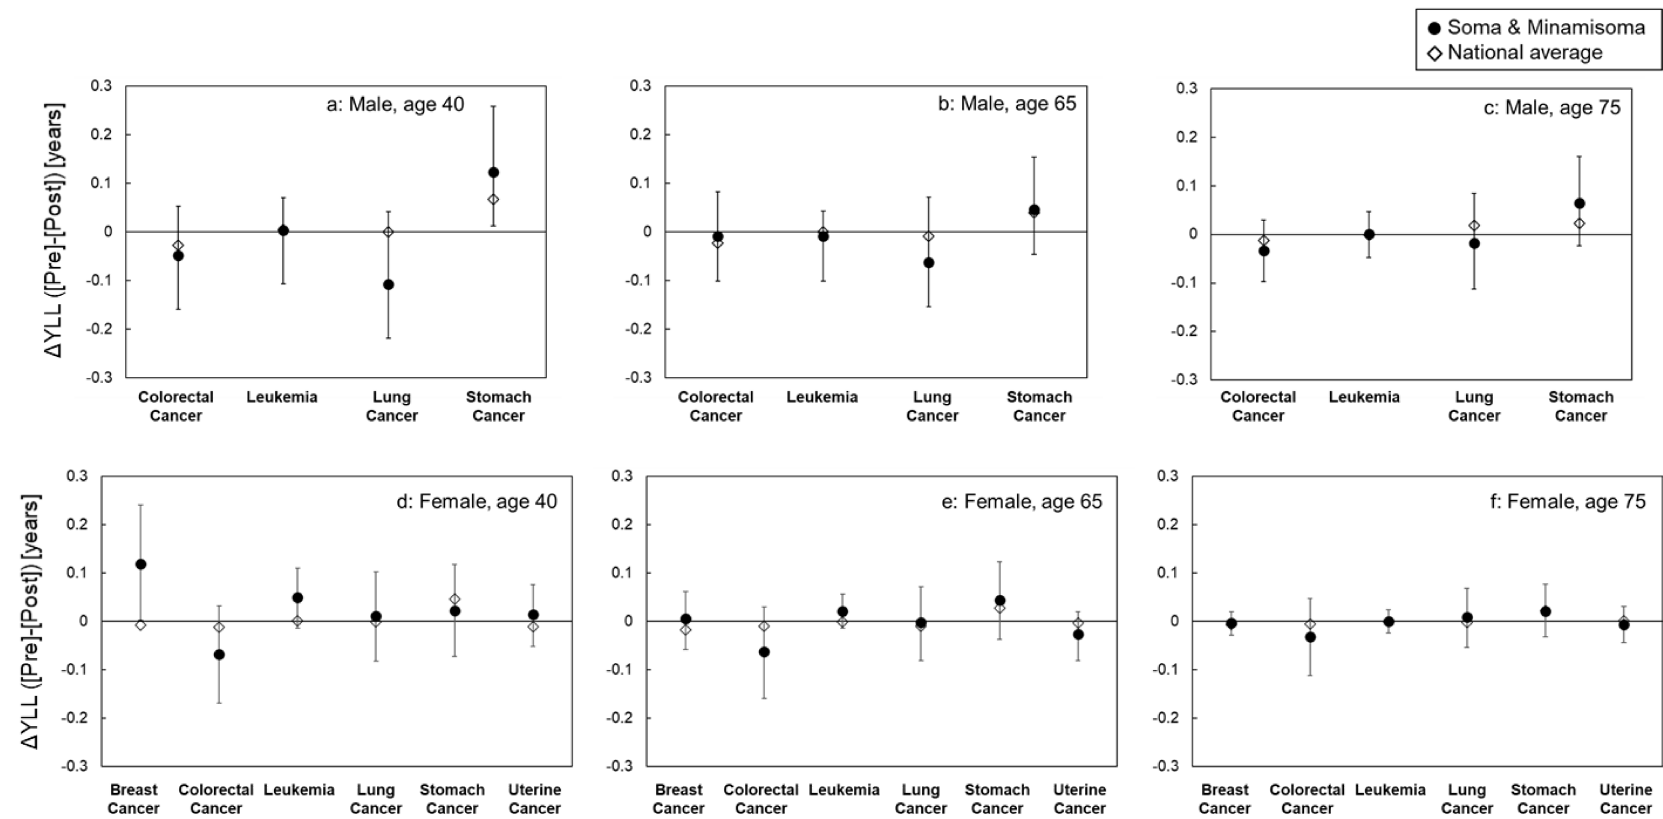

Figure S5a-f. Differences between YLL pre-disaster and YLL post-disaster due to specific cancers at ages 40, 65 and 75 (a –c: Males, d–f: Females). For the subject area (Soma and Minamisoma cities), the error bar indicates the 95% UI of the estimate.

# **YLL at the year of the disaster (2011) and after the year of the disaster (2012–2015)**

We calculated the YLL post-disaster separately for two periods, i.e. 2011 and 2012–2015 (Tables S1a and S1b). For YLL in 2011, we used population data and death records for a single year (2011) and calculated the values. Similar to that for YLL in 2012–2015, we used population data and death records for the four years and calculated the values. The UI of the estimation was not calculated. The mortality rate at age 0 followed the national values in 2015, both reported by the MHLW.[5] For ages over 95 years, we used the force of mortality instead of  $q_x$ . The force of mortality was based on the Gompertz–Makeham coefficients obtained from the MHLW.[7]

Table S1a. YLL at the year of the disaster (2011) and after the year of the disaster (2012–2015) [years]: Males

|                          | Age 0 years |           | Age 40 years |           | Age 65 years |           | Age 75 years |           |
|--------------------------|-------------|-----------|--------------|-----------|--------------|-----------|--------------|-----------|
|                          | 2011        | 2012–2015 | 2011         | 2012–2015 | 2011         | 2012–2015 | 2011         | 2012–2015 |
| Heart diseases           | 1.53        | 1.86      | 1.57         | 1.86      | 1.37         | 1.41      | 1.00         | 1.10      |
| Cerebrovascular diseases | 1.08        | 0.98      | 1.05         | 1.00      | 0.84         | 0.76      | 0.77         | 0.64      |
| Pneumonia                | 1.05        | 0.69      | 1.08         | 0.69      | 1.02         | 0.67      | 0.90         | 0.61      |
| Cancer                   | 3.24        | 3.62      | 3.19         | 3.60      | 2.26         | 2.90      | 1.65         | 1.95      |

Table S1b. YLL at the year of the disaster (2011) and after the year of the disaster (2012–2015) [years]: Females

|                          | Age 0 years |           | Age 40 years |           | Age 65 years |           | Age 75 years |           |
|--------------------------|-------------|-----------|--------------|-----------|--------------|-----------|--------------|-----------|
|                          | 2011        | 2012–2015 | 2011         | 2012–2015 | 2011         | 2012–2015 | 2011         | 2012–2015 |
| Heart diseases           | 1.33        | 1.24      | 1.33         | 1.22      | 1.28         | 1.12      | 1.22         | 1.06      |
| Cerebrovascular diseases | 0.87        | 0.91      | 0.88         | 0.92      | 0.68         | 0.82      | 0.70         | 0.73      |
| Pneumonia                | 0.61        | 0.68      | 0.62         | 0.54      | 0.60         | 0.51      | 0.62         | 0.48      |
| Cancer                   | 2.26        | 2.44      | 2.11         | 2.34      | 1.43         | 1.67      | 0.86         | 1.13      |

## References

- [1] Jayatilleke N, Hayes RD, Dutta R, Shetty H, Hotopf M, Chang C, et al. Contributions of specific causes of death to lost life expectancy in severe mental illness. *Eur Psychiatry* 2017;43:109–15. <https://doi.org/10.1016/j.eurpsy.2017.02.487>.
- [2] GBD 2015 DALYs and HALE Collaborators. Global, regional, and national disability-adjusted life-years (DALYs) for 315 diseases and injuries and healthy life expectancy (HALE), 1990–2015: a systematic analysis for the Global Burden of Disease Study 2015. *Lancet* 2016;388:1603–58. [https://doi.org/10.1016/S0140-6736\(16\)31460-X](https://doi.org/10.1016/S0140-6736(16)31460-X).
- [3] Cohen BL, Lee IS. A catalog of risks. *Health Phys* 1979;36:707–22. <https://doi.org/10.1097/00004032-197906000-00007>.
- [4] MHLW (Japanese Ministry of Health Labour and Welfare). The 21st Life Tables 2010. <https://www.mhlw.go.jp/english/database/db-hw/lifetb21th/dl/data.pdf>.
- [5] MHLW (Japanese Ministry of Health Labour and Welfare). Table A. The 22nd Life Tables, 2015. 2015.
- [6] MHLW (Japanese Ministry of Health Labour and Welfare). Method for constructing the 21st life tables 2012. <https://www.e-stat.go.jp/stat-search/files?page=1&layout=datalist&toukei=00450012&tstat=000001031336&cycle=7&year=20100&month=0&tclass1=000001060864&tclass2=000001060927>.
- [7] MHLW (Japanese Ministry of Health Labour and Welfare). Method for constructing the 22nd life tables 2015. <https://www.e-stat.go.jp/stat-search/file-download?statInfId=000031543052&fileKind=2>.
- [8] NtRand. Excel add-in NtRand Ver 3.3.0 n.d.
